# Supplementary material
Source: publisher figshare collection journal article supplement (https://plos.figshare.com/articles/dataset/_/3959250)
Supplement: Supplementary file 1 [file 1 › S1 Fig.PDF]

## S1 Fig

**Risk of bias summary: review authors' judgements about each risk of bias item for each included study.**

|             | Random sequence generation (selection bias) | Allocation concealment (selection bias) | Blinding of participants and personnel (performance bias) | Blinding of outcome assessment (detection bias) | Incomplete outcome data (attrition bias) | Selective reporting (reporting bias) | Other bias |
|-------------|---------------------------------------------|-----------------------------------------|-----------------------------------------------------------|-------------------------------------------------|------------------------------------------|--------------------------------------|------------|
| AFFIRM      | +                                           | +                                       | +                                                         | +                                               | +                                        | +                                    | ?          |
| ALLEGRO     | +                                           | +                                       | +                                                         | +                                               | +                                        | +                                    | ?          |
| BRAVO       | +                                           | +                                       | ?                                                         | +                                               | +                                        | +                                    | ?          |
| CAMMS223    | +                                           | +                                       | ?                                                         | +                                               | +                                        | +                                    | ?          |
| CARE-MS I   | +                                           | +                                       | ?                                                         | +                                               | +                                        | +                                    | ?          |
| CARE-MS II  | +                                           | +                                       | ?                                                         | +                                               | +                                        | +                                    | ?          |
| COPOLYMER I | +                                           | +                                       | +                                                         | +                                               | +                                        | +                                    | ?          |
| DEFINE      | +                                           | +                                       | +                                                         | +                                               | +                                        | +                                    | ?          |
| FREEDOMS    | +                                           | +                                       | +                                                         | +                                               | +                                        | +                                    | -          |
| FREEDOMS II | +                                           | +                                       | +                                                         | +                                               | +                                        | +                                    | ?          |
| MSCRG       | +                                           | +                                       | +                                                         | +                                               | +                                        | +                                    | ?          |
| Rinaldi     | -                                           | -                                       | -                                                         | -                                               | +                                        | +                                    | ?          |
| SELECT      | +                                           | +                                       | +                                                         | +                                               | +                                        | +                                    | ?          |
| TEMPO       | +                                           | +                                       | +                                                         | +                                               | +                                        | +                                    | ?          |
| TRANSFORMS  | +                                           | +                                       | +                                                         | +                                               | +                                        | +                                    | ?          |
