# Supplementary material
Source: publisher figshare collection journal article supplement (https://plos.figshare.com/articles/dataset/_/3959250)
Supplement: Supplementary file 1 [file 1 › S1 Table.PDF]

# S1 Table

## Baseline characteristics of included trials.

| Study                       | Year | Technique | Randomized | Type of DMD | DMD                     | Number of patients | Sex ratio, f/m | Age, years mean | SD    | EDSS, no mean | SD   | ARR, no mean | SD   | Duration, years mean | SD   |
|-----------------------------|------|-----------|------------|-------------|-------------------------|--------------------|----------------|-----------------|-------|---------------|------|--------------|------|----------------------|------|
| BRAVO [1]                   | 2014 | SIENA     | yes        | FLDMD       | IFN-B1a                 | 447                | 2.19           | 38.20           | 9.50  | 2.60          | 1.20 | 1.30         | 0.60 | 7.00                 | 5.90 |
|                             |      |           |            | FLDMD       | LAQ 0,6mg               | 434                | 1.86           | 37.00           | 9.30  | 2.70          | 1.30 | 1.30         | 0.60 | 6.60                 | 6.00 |
|                             |      |           |            | Placebo     | Placebo                 | 450                | 2.48           | 37.50           | 9.50  | 2.70          | 1.20 | 1.30         | 0.60 | 6.90                 | 6.60 |
| FREEDOMS II [2]             | 2014 | SIENA     | yes        | SLDMD       | FIN 1,25mg              | 370                | 3.16           | 40.90           | 8.90  | 2.50          | 1.30 | 1.50         | 1.00 | 10.80                | 8.20 |
|                             |      |           |            | SLDMD       | FIN 0,5mg               | 358                | 3.31           | 40.60           | 8.40  | 2.40          | 1.30 | 1.40         | 0.90 | 10.40                | 8.00 |
|                             |      |           |            | Placebo     | Placebo                 | 355                | 4.30           | 40.10           | 8.40  | 2.40          | 1.30 | 1.50         | 0.90 | 10.60                | 7.90 |
| SELECT [3]                  | 2013 | SIENA     | yes        | SLDMD       | DAC 150mg               | 208                | 2.03           | 35.30           | 8.90  | 2.80          | 1.20 | 1.40         | 0.70 | 3.00                 | NA   |
|                             |      |           |            | SLDMD       | DAC 300mg               | 209                | 1.78           | 35.20           | 8.70  | 2.70          | 1.20 | 1.30         | 0.70 | 3.00                 | NA   |
|                             |      |           |            | Placebo     | Placebo                 | 204                | 1.70           | 36.60           | 9.00  | 2.70          | 1.20 | 1.30         | 0.60 | 2.00                 | NA   |
| Vidal-Jordana [4]           | 2013 | SIENA     | no         | SLDMD       | NTZ 300mg               | 39                 | 2.55           | 34.95           | 8.75  | 4.00          | NA   | NA           | NA   | 10.98                | NA   |
| CARE-MS I [5]               | 2012 | BPF       | yes        | FLDMD       | IFN-B1a                 | 187                | 1.86           | 33.20           | 8.50  | 2.00          | 0.80 | 1.80         | 0.80 | 2.00                 | 1.30 |
|                             |      |           |            | SLDMD       | ALM 12mg                | 376                | 1.86           | 33.00           | 8.00  | 2.00          | 0.80 | 1.80         | 0.80 | 2.10                 | 1.40 |
| CARE-MS II [6]              | 2012 | BPF       | yes        | FLDMD       | IFN-B1a                 | 202                | 1.86           | 35.80           | 8.77  | 2.70          | 1.21 | 1.50         | 0.75 | 4.70                 | 2.86 |
|                             |      |           |            | SLDMD       | ALM 12mg                | 426                | 1.94           | 34.80           | 8.36  | 2.70          | 1.26 | 1.70         | 0.86 | 4.50                 | 2.68 |
|                             |      |           |            | SLDMD       | ALM 24mg                | 170                | 2.45           | 35.10           | 8.40  | 2.70          | 1.17 | 1.60         | 0.86 | 4.30                 | 2.77 |
| DEFINE [7,8]                | 2012 | SIENA     | yes        | FLDMD       | BG-12 480mg             | 176                | 3.35           | 38.30           | 9.30  | 2.30          | 1.20 | 1.30         | 0.60 | 8.70                 | 7.10 |
|                             |      |           |            | FLDMD       | BG-12 720mg             | 184                | 3.17           | 38.50           | 8.60  | 2.30          | 1.20 | 1.30         | 0.60 | 8.00                 | 6.00 |
|                             |      |           |            | Placebo     | Placebo                 | 180                | 3.55           | 38.30           | 9.20  | 2.50          | 1.20 | 1.30         | 0.70 | 8.60                 | 6.60 |
| ALLEGRO [9]                 | 2012 | SIENA     | yes        | FLDMD       | LAQ 0,6mg               | 550                | 2.46           | 38.90           | 9.20  | 2.60          | 1.30 | 1.20         | 0.70 | 8.70                 | 6.90 |
|                             |      |           |            | Placebo     | Placebo                 | 556                | 1.96           | 38.50           | 9.10  | 2.60          | 1.30 | 1.30         | 0.70 | 8.70                 | 6.70 |
| Portaccio [10]              | 2012 | SIENA     | no         | FLDMD       | IFN-B                   | 14                 | 3.67           | 39.00           | 9.20  | 1.30          | 0.40 | 1.10         | 0.30 | 8.60                 | 3.80 |
|                             |      |           |            | SLDMD       | NTZ                     | 12                 | 3.00           | 37.30           | 11.90 | 3.50          | 1.60 | 2.30         | 0.60 | 8.10                 | 4.70 |
| Rinaldi [11]                | 2012 | CTh       | no         | FLDMD       | IFN-B1 or AG            | 50                 | 2.21           | 36.00           | 8.20  | 2.00          | 1.00 | 0.50         | 0.50 | 5.00                 | 2.20 |
|                             |      |           |            | SLDMD       | NTZ                     | 35                 | 1.50           | 32.60           | 7.30  | 3.20          | 1.20 | 2.30         | 1.00 | 8.70                 | 4.90 |
|                             |      |           |            | Placebo     | Not treated             | 35                 | 2.50           | 39.10           | 11.20 | 1.30          | 0.80 | 1.00         | 0.90 | 6.00                 | 4.80 |
| Ruocco [12]                 | 2012 | BPFV      | no         | FLDMD       | IFN-B1 or AG            | 54                 | 2.18           | 30.00           | 9.60  | 2.60          | 1.20 | 1.40         | 1.00 | 10.00                | 5.80 |
| Magraner [13]               | 2012 | SIENA     | no         | SLDMD       | NTZ                     | 18                 | 3.50           | 31.60           | 9.00  | 3.10          | 0.90 | 2.00         | 1.10 | 7.20                 | 5.70 |
| IMPROVE [14,15]             | 2012 | SIENA     | yes        | FLDMD       | IFN-B1a 44µg            | 120                | NA             | NA              | NA    | NA            | NA   | NA           | NA   | NA                   | NA   |
|                             |      |           |            | Placebo     | Placebo                 | 60                 | NA             | NA              | NA    | NA            | NA   | NA           | NA   | NA                   | NA   |
| TEMSO [16]                  | 2011 | BPF       | yes        | FLDMD       | TER 7mg                 | 366                | 2.30           | 37.40           | 9.00  | 2.68          | 1.34 | 1.40         | 0.70 | 8.80                 | 6.80 |
|                             |      |           |            | FLDMD       | TER 14mg                | 359                | 2.45           | 37.80           | 8.20  | 2.67          | 1.24 | 1.30         | 0.70 | 8.70                 | 6.70 |
|                             |      |           |            | Placebo     | Placebo                 | 363                | 3.13           | 38.40           | 9.00  | 2.68          | 1.34 | 1.40         | 0.70 | 8.60                 | 7.10 |
| FORTE [17]                  | 2011 | SIENA     | yes        | FLDMD       | AG 20mg                 | 586                | 2.55           | 36.30           | 9.00  | 2.20          | 1.20 | 1.50         | 0.70 | 3.00                 | 4.00 |
|                             |      |           |            | FLDMD       | AG 40mg                 | 569                | 2.51           | 36.30           | 9.00  | 2.10          | 1.10 | 1.40         | 0.70 | 3.30                 | 4.80 |
| QUALICORE [18]              | 2010 | BPF       | no         | FLDMD       | IFN-B1a                 | 28                 | 2.50           | 32.50           | NA    | 1.70          | NA   | 1.70         | NA   | 2.50                 | NA   |
| SENTINEL [19,20]            | 2010 | BPF       | yes        | FLDMD       | IFN-B1a 30µg            | 582                | 2.60           | 39.10           | 7.60  | 2.50          | 1.10 | 1.49         | 0.72 | 8.00                 | NA   |
| Van den Elskamp [21]        | 2010 | SIENA     | no         | Placebo     | oral IFN-B1a or Placebo | 135                | 2.65           | 35.80           | 8.60  | 2.00          | NA   | NA           | NA   | 6.60                 | 5.50 |
| FREEDOMS [22]               | 2010 | SIENA     | yes        | SLDMD       | FIN 1,25mg              | 429                | 2.21           | 37.40           | 8.90  | 2.40          | 1.40 | 1.50         | 0.80 | 8.40                 | 6.90 |
|                             |      |           |            | SLDMD       | FIN 0,5mg               | 425                | 2.29           | 36.60           | 8.80  | 2.30          | 1.30 | 1.50         | 0.80 | 8.00                 | 6.60 |
|                             |      |           |            | Placebo     | Placebo                 | 418                | 2.48           | 37.20           | 8.60  | 2.50          | 1.30 | 1.40         | 0.70 | 8.10                 | 6.40 |
| TRANSFORMS [23]             | 2010 | SIENA     | yes        | FLDMD       | IFN-B1a 30µg            | 435                | 2.11           | 36.00           | 8.30  | 2.19          | 1.26 | 1.50         | 0.80 | 7.40                 | 6.30 |
|                             |      |           |            | SLDMD       | FIN 1,25mg              | 426                | 2.21           | 35.80           | 8.40  | 2.21          | 1.31 | 1.50         | 0.90 | 7.30                 | 6.00 |
|                             |      |           |            | SLDMD       | FIN 0,5mg               | 431                | 1.89           | 36.70           | 8.80  | 2.24          | 1.33 | 1.50         | 1.20 | 7.50                 | 6.20 |
| BEYOND [24]                 | 2009 | SIENA     | yes        | FLDMD       | AG 20mg                 | 448                | 2.13           | 35.20           | NA    | 2.28          | NA   | 1.60         | NA   | 5.10                 | NA   |
|                             |      |           |            | FLDMD       | IFN-B1b 500µg           | 899                | 2.33           | 35.90           | NA    | 2.33          | NA   | 1.60         | NA   | 5.40                 | NA   |
|                             |      |           |            | FLDMD       | IFN-B1b 250µg           | 897                | 2.33           | 35.80           | NA    | 2.35          | NA   | 1.60         | NA   | 5.30                 | NA   |
| ASA [25]                    | 2009 | SIENA     | yes        | FLDMD       | IFN-B1a 30µg            | 60                 | 4.00           | 28.90           | 7.10  | 1.80          | 0.90 | 1.80         | 0.80 | 4.40                 | 4.20 |
| CAMMS223 [26]               | 2008 | SBV       | yes        | FLDMD       | IFN-B1a                 | 111                | 1.78           | 32.80           | 8.80  | 1.90          | 0.83 | NA           | NA   | 1.40                 | NA   |
|                             |      |           |            | SLDMD       | ALM 12mg                | 112                | 1.80           | 31.90           | 8.00  | 1.90          | 0.74 | NA           | NA   | 1.30                 | NA   |
|                             |      |           |            | SLDMD       | ALM 24mg                | 110                | 1.82           | 32.20           | 8.80  | 2.00          | 0.73 | NA           | NA   | 1.20                 | NA   |
| REGARD [27]                 | 2008 | SIENA     | yes        | FLDMD       | AG 20mg                 | 378                | 2.57           | 36.80           | 9.50  | 2.33          | 1.31 | NA           | NA   | 6.55                 | 7.10 |
|                             |      |           |            | FLDMD       | IFN-B1a 44µg            | 386                | 2.23           | 36.70           | 9.80  | 2.35          | 1.28 | NA           | NA   | 5.93                 | 6.25 |
| CORAL [28]                  | 2008 | CBV       | yes        | Placebo     | Placebo                 | 548                | 2.70           | 36.00           | 7.00  | 2.00          | NA   | NA           | NA   | 7.80                 | 6.20 |
| Zivadinov [29]              | 2007 | BPF       | no         | FLDMD       | IFN-B1a                 | 26                 | 1.60           | 45.00           | NA    | 2.00          | NA   | NA           | NA   | 13.00                | NA   |
|                             |      |           |            | Placebo     | Placebo                 | 28                 | 3.00           | 47.00           | NA    | 1.00          | NA   | NA           | NA   | 12.50                | NA   |
| AFFIRM [30,31]              | 2007 | BPF       | yes        | SLDMD       | NTZ 300mg               | 627                | 2.57           | 35.60           | 8.50  | 2.30          | 1.20 | NA           | NA   | 5.00                 | NA   |
|                             |      |           |            | Placebo     | Placebo                 | 315                | 2.03           | 36.70           | 7.80  | 2.30          | 1.20 | NA           | NA   | 6.00                 | NA   |
| FTY720 D2201 [32]           | 2006 | SIENA     | yes        | SLDMD       | FIN 1,25mg              | 93                 | 3.00           | 38.00           | NA    | 2.70          | NA   | 1.30         | NA   | 8.60                 | NA   |
|                             |      |           |            | SLDMD       | FIN 5mg                 | 92                 | 2.45           | 38.30           | NA    | 2.50          | NA   | 1.30         | NA   | 9.50                 | NA   |
|                             |      |           |            | Placebo     | Placebo                 | 92                 | 1.94           | 37.10           | NA    | 2.60          | NA   | 1.20         | NA   | 8.40                 | NA   |
| Hardmeier [33]              | 2005 | BPF       | no         | FLDMD       | IFNB1a 30µg or 60µg     | 386                | NA             | 37.00           | 7.40  | 3.50          | NA   | NA           | NA   | 7.30                 | 5.70 |
| Frank [34]                  | 2004 | BV        | no         | FLDMD       | IFN-B1b                 | 30                 | NA             | NA              | NA    | 2.80          | 2.10 | NA           | NA   | NA                   | NA   |
| PRISMS [35]                 | 2003 | BPV       | yes        | FLDMD       | IFN-B1a 22µg or 44µg    | 13                 | 2.33           | 32.00           | NA    | 2.00          | NA   | NA           | NA   | 4.00                 | NA   |
|                             |      |           |            | Placebo     | Placebo                 | 7                  | 2.33           | 32.00           | NA    | 2.00          | NA   | NA           | NA   | 4.00                 | NA   |
| Paolillo [36,37]            | 2002 | SBV       | yes        | FLDMD       | IFN-B1a 33µg            | 57                 | 2.33           | 30.20           | 7.70  | 2.00          | 1.20 | 1.60         | 1.20 | 5.20                 | 2.80 |
| EUROPEAN / CANADIAN [38,39] | 2001 | CBV       | yes        | FLDMD       | AG 20mg                 | 113                | 3.35           | 34.40           | 7.40  | 2.30          | 1.10 | NA           | NA   | 8.00                 | 5.55 |
|                             |      |           |            | Placebo     | Placebo                 | 114                | 2.68           | 34.00           | 7.60  | 2.40          | 1.20 | NA           | NA   | 8.30                 | 5.58 |
| MSCRG [40,41]               | 2000 | BPF       | yes        | FLDMD       | IFN-B1a                 | 68                 | NA             | 36.50           | 7.20  | 2.32          | 0.79 | NA           | NA   | 6.60                 | 5.80 |
|                             |      |           |            | Placebo     | Placebo                 | 72                 | NA             | 36.40           | 7.10  | 2.38          | 0.91 | NA           | NA   | 6.20                 | 5.50 |
| COPOLYMER I [42,43]         | 2000 | BPV       | yes        | FLDMD       | AG 20mg                 | 14                 | NA             | 37.10           | NA    | 3.00          | NA   | NA           | NA   | 5.20                 | NA   |
|                             |      |           |            | Placebo     | Placebo                 | 13                 | NA             | 34.40           | NA    | 2.40          | NA   | NA           | NA   | 4.20                 | NA   |

EDSS: Expanded Disability Status Scale; ARR: Annual Relapse Rate; Duration: disease duration between first relapse or diagnostic; SD: Standard Deviation; SIENA: Structural Image Evaluation, using Normalisation, of Atrophy; BPF: Brain Parenchymal Fraction; CTh: Cortical Thickness; BPFV: Brain Parenchymal Fraction Volume; SBV: Supratentorial Brain Volume; CBV: Central Brain Volume; BV: Brain Volume; BPV: Brain Parenchymal Volume; DMD: Disease Modifying Drug; FLDMD: First-line DMD; SLDMD, Second-line DMD; GA, Glatiramer Acetate; IFN: Interferon; TER: Terifluomide; LAQ: Laquinimod; BG-12: dimethyl fumarate; NTZ: Natalizumab; FIN: Fingolimod; ALM: Alemtuzumab; DAC: Daclizumab; NA: Not Available.

1. Vollmer TL, Sorensen PS, Selmaj K, Zipp F, Havrdova E, Cohen JA, et al. A randomized placebo-controlled phase III trial of oral laquinimod for multiple sclerosis. *J Neurol.* 2014;261: 773–783. PMID: 24535134
2. Calabresi PA, Radue E-W, Goodin D, Jeffery D, Rammohan KW, Reder AT, et al. Safety and efficacy of fingolimod in patients with relapsing-remitting multiple sclerosis (FREEDOMS II): a double-blind, randomised, placebo-controlled, phase 3 trial. *Lancet Neurol.* 2014;13: 545–556. PMID: 24685276
3. Gold R, Giovannoni G, Selmaj K, Havrdova E, Montalban X, Radue E-W, et al. Daclizumab high-yield process in relapsing-remitting multiple sclerosis (SELECT): a randomised, double-blind, placebo-controlled trial. *Lancet.* 2013;381: 2167–2175. PMID: 23562009
4. Vidal-Jordana A, Sastre-Garriga J, Pérez-Miralles F, Tur C, Tintoré M, Horga A, et al. Early brain pseudoatrophy while on natalizumab therapy is due to white matter volume changes. *Mult Scler.* 2013;19: 1175–1181. PMID: 23319072
5. Cohen JA, Coles AJ, Arnold DL, Confavreux C, Fox EJ, Hartung H-P, et al. Alemtuzumab versus interferon beta 1a as first-line treatment for patients with relapsing-remitting multiple sclerosis: a randomised controlled phase 3 trial. *Lancet.* 2012;380: 1819–1828. PMID: 23122652
6. Coles AJ, Twyman CL, Arnold DL, Cohen JA, Confavreux C, Fox EJ, et al. Alemtuzumab for patients with relapsing multiple sclerosis after disease-modifying therapy: a randomised controlled phase 3 trial. *Lancet.* 2012;380: 1829–1839. PMID: 23122650
7. Gold R, Kappos L, Arnold DL, Bar-Or A, Giovannoni G, Selmaj K, et al. Placebo-controlled phase 3 study of oral BG-12 for relapsing multiple sclerosis. *N Engl J Med.* 2012;367: 1098–1107. PMID: 22992073
8. Arnold DL, Gold R, Kappos L, Bar-Or A, Giovannoni G, Selmaj K, et al. Effects of BG-12 (Dimethyl Fumarate) on Magnetic Resonance Imaging and Magnetization Transfer Ratio Outcomes in Relapsing–Remitting Multiple Sclerosis: Findings from the Phase 3 DEFINE Study. 2012 Oct; 28th Congress of the European Committee for Treatment and Research in Multiple Sclerosis, Lyon, France.
9. Comi G, Jeffery D, Kappos L, Montalban X, Boyko A, Rocca MA, et al. Placebo-controlled trial of oral laquinimod for multiple sclerosis. *N Engl J Med.* 2012;366: 1000–1009. PMID: 22417253
10. Portaccio E, Stromillo ML, Goretti B, Hakiki B, Giorgio A, Rossi F, et al. Natalizumab may reduce cognitive changes and brain atrophy rate in relapsing-remitting multiple sclerosis: a prospective, non-randomized pilot study. *Eur J Neurol.* 2012; PMID: 23057658

11. Rinaldi F, Calabrese M, Seppi D, Puthenparampil M, Perini P, Gallo P. Natalizumab strongly suppresses cortical pathology in relapsing-remitting multiple sclerosis. *Mult Scler*. 2012;18: 1760–1767. PMID: 22570359
12. Ruocco HH, Brandão CO, Farias AS, Oliveira C, Oliveira EC, Cendes F, et al. Quantitative MRI and cerebrospinal fluid inflammatory mediators in Brazilian patients with relapsing-remitting multiple sclerosis before and after treatment with immunomodulators: a longitudinal study. *Neuroimmunomodulation*. 2012;19: 277–282. PMID: 22472803
13. Magraner M, Coret F, Casanova B. The relationship between inflammatory activity and brain atrophy in natalizumab treated patients. *Eur J Radiol*. 2012;81: 3485–3490. PMID: 22391507
14. De Stefano N, Sormani MP, Stubinski B, Blevins G, Drulovic JS, Issard D, et al. Efficacy and safety of subcutaneous interferon  $\beta$ -1a in relapsing-remitting multiple sclerosis: further outcomes from the IMPROVE study. *J Neurol Sci*. 2012;312: 97–101. PMID: 21880336
15. De Stefano N, Curtin F, Stubinski B, Blevins G, Drulovic J, Issard D, et al. Rapid benefits of a new formulation of subcutaneous interferon beta-1a in relapsing-remitting multiple sclerosis. *Mult Scler*. 2010;16: 888–892. PMID: 20200197
16. O'Connor P, Wolinsky JS, Confavreux C, Comi G, Kappos L, Olsson TP, et al. Randomized trial of oral teriflunomide for relapsing multiple sclerosis. *N Engl J Med*. 2011;365: 1293–1303. PMID: 21991951
17. Comi G, Cohen JA, Arnold DL, Wynn D, Filippi M. Phase III dose-comparison study of glatiramer acetate for multiple sclerosis. *Ann Neurol*. 2011;69: 75–82. PMID: 21280077
18. Cohen M, Lebrun C, Aufauvre D, Chanalet S, Filleau-Bertogliatti C, Camu W, et al. [Longitudinal study of health related quality of life in multiple sclerosis: correlation with MRI parameters]. *Rev Neurol (Paris)*. 2010;166: 894–900. PMID: 20728910
19. Radue E-W, Stuart WH, Calabresi PA, Confavreux C, Galetta SL, Rudick RA, et al. Natalizumab plus interferon beta-1a reduces lesion formation in relapsing multiple sclerosis. *J Neurol Sci*. 2010;292: 28–35. PMID: 20236661
20. Rudick RA, Stuart WH, Calabresi PA, Confavreux C, Galetta SL, Radue E-W, et al. Natalizumab plus interferon beta-1a for relapsing multiple sclerosis. *N Engl J Med*. 2006;354: 911–923. PMID: 16510745
21. van den Elskamp IJ, Boden B, Dattola V, Knol DL, Filippi M, Kappos L, et al. Cerebral atrophy as outcome measure in short-term phase 2 clinical trials in multiple sclerosis. *Neuroradiology*. 2010;52: 875–881. PMID: 20049424
22. Kappos L, Radue E-W, O'Connor P, Polman C, Hohlfeld R, Calabresi P, et al. A placebo-controlled trial of oral fingolimod in relapsing multiple sclerosis. *N Engl J Med*. 2010;362: 387–401. PMID: 20089952
23. Cohen JA, Barkhof F, Comi G, Hartung H-P, Khatri BO, Montalban X, et al. Oral fingolimod or intramuscular interferon for relapsing multiple sclerosis. *N Engl J Med*. 2010;362: 402–415. PMID: 20089954
24. O'Connor P, Filippi M, Arnason B, Comi G, Cook S, Goodin D, et al. 250 microg or 500 microg interferon beta-1b versus 20 mg glatiramer acetate in relapsing-remitting multiple sclerosis: a prospective, randomised, multicentre study. *Lancet Neurol*. 2009;8: 889–897. PMID: 19729344

25. Havrdova E, Zivadinov R, Krasensky J, Dwyer MG, Novakova I, Dolezal O, et al. Randomized study of interferon beta-1a, low-dose azathioprine, and low-dose corticosteroids in multiple sclerosis. *Mult Scler.* 2009;15: 965–976. PMID: 19465443
26. CAMMS223 Trial Investigators, Coles AJ, Compston DAS, Selmaj KW, Lake SL, Moran S, et al. Alemtuzumab vs. interferon beta-1a in early multiple sclerosis. *N Engl J Med.* 2008;359: 1786–1801. PMID: 18946064
27. Mikol DD, Barkhof F, Chang P, Coyle PK, Jeffery DR, Schwid SR, et al. Comparison of subcutaneous interferon beta-1a with glatiramer acetate in patients with relapsing multiple sclerosis (the REbif vs Glatiramer Acetate in Relapsing MS Disease [REGARD] study): a multicentre, randomised, parallel, open-label trial. *Lancet Neurol.* 2008;7: 903–914. PMID: 18789766
28. Mesaros S, Rocca MA, Sormani MP, Charil A, Comi G, Filippi M. Clinical and conventional MRI predictors of disability and brain atrophy accumulation in RRMS. A large scale, short-term follow-up study. *J Neurol.* 2008;255: 1378–1383. PMID: 18584233
29. Zivadinov R, Locatelli L, Cookfair D, Srinivasaraghavan B, Bertolotto A, Ukmar M, et al. Interferon beta-1a slows progression of brain atrophy in relapsing-remitting multiple sclerosis predominantly by reducing gray matter atrophy. *Mult Scler.* 2007;13: 490–501. PMID: 17463072
30. Miller DH, Soon D, Fernando KT, MacManus DG, Barker GJ, Yousry TA, et al. MRI outcomes in a placebo-controlled trial of natalizumab in relapsing MS. *Neurology.* 2007;68: 1390–1401. PMID: 17452584
31. Polman CH, O'Connor PW, Havrdova E, Hutchinson M, Kappos L, Miller DH, et al. A randomized, placebo-controlled trial of natalizumab for relapsing multiple sclerosis. *N Engl J Med.* 2006;354: 899–910. PMID: 16510744
32. Kappos L, Antel J, Comi G, Montalban X, O'Connor P, Polman CH, et al. Oral fingolimod (FTY720) for relapsing multiple sclerosis. *N Engl J Med.* 2006;355: 1124–1140. PMID: 16971719
33. Hardmeier M, Wagenpfeil S, Freitag P, Fisher E, Rudick RA, Kooijmans M, et al. Rate of brain atrophy in relapsing MS decreases during treatment with IFNbeta-1a. *Neurology.* 2005;64: 236–240. PMID: 15668419
34. Frank JA, Richert N, Bash C, Stone L, Calabresi PA, Lewis B, et al. Interferon-beta-1b slows progression of atrophy in RRMS: Three-year follow-up in NAb- and NAb+ patients. *Neurology.* 2004;62: 719–725. PMID: 15007120
35. Turner B, Lin X, Calmon G, Roberts N, Blumhardt LD. Cerebral atrophy and disability in relapsing-remitting and secondary progressive multiple sclerosis over four years. *Mult Scler.* 2003;9: 21–27. PMID: 12617263
36. Paolillo A, Pozzilli C, Giugni E, Tomassini V, Gasperini C, Fiorelli M, et al. A 6-year clinical and MRI follow-up study of patients with relapsing-remitting multiple sclerosis treated with Interferon-beta. *Eur J Neurol.* 2002;9: 645–655. PMID: 12453081
37. Pozzilli C, Bastianello S, Koudriavtseva T, Gasperini C, Bozzao A, Millefiorini E, et al. Magnetic resonance imaging changes with recombinant human interferon-beta-1a: a short term study in relapsing-remitting multiple sclerosis. *J Neurol Neurosurg Psychiatr.* 1996;61: 251–258. PMID: 8795595

38. Rovaris M, Comi G, Rocca MA, Wolinsky JS, Filippi M. Short-term brain volume change in relapsing-remitting multiple sclerosis: effect of glatiramer acetate and implications. *Brain*. 2001;124: 1803–1812. PMID: 11522582
39. Comi G, Filippi M, Wolinsky JS. European/Canadian multicenter, double-blind, randomized, placebo-controlled study of the effects of glatiramer acetate on magnetic resonance imaging--measured disease activity and burden in patients with relapsing multiple sclerosis. European/Canadian Glatiramer Acetate Study Group. *Ann Neurol*. 2001;49: 290–297. PMID: 11261502
40. Rudick RA, Fisher E, Lee JC, Duda JT, Simon J. Brain atrophy in relapsing multiple sclerosis: relationship to relapses, EDSS, and treatment with interferon beta-1a. *Mult Scler*. 2000;6: 365–372. PMID: 11212130
41. Jacobs LD, Cookfair DL, Rudick RA, Herndon RM, Richert JR, Salazar AM, et al. Intramuscular interferon beta-1a for disease progression in relapsing multiple sclerosis. The Multiple Sclerosis Collaborative Research Group (MSCRG). *Ann Neurol*. 1996;39: 285–294. PMID: 8602746
42. Ge Y, Grossman RI, Udupa JK, Wei L, Mannon LJ, Polansky M, et al. Brain atrophy in relapsing-remitting multiple sclerosis and secondary progressive multiple sclerosis: longitudinal quantitative analysis. *Radiology*. 2000;214: 665–670. PMID: 10715027
43. Johnson KP, Brooks BR, Cohen JA, Ford CC, Goldstein J, Lisak RP, et al. Copolymer 1 reduces relapse rate and improves disability in relapsing-remitting multiple sclerosis: results of a phase III multicenter, double-blind placebo-controlled trial. The Copolymer 1 Multiple Sclerosis Study Group. *Neurology*. 1995;45: 1268–1276. PMID: 7617181
