# Supplementary material
Source: publisher figshare collection journal article supplement (https://plos.figshare.com/articles/dataset/_/3959250)
Supplement: Supplementary file 1 [file 1 › S1 Text.PDF]

## S1 Text

### MEDLINE search algorithm.

("multiple sclerosis"[MeSH Terms] OR "multiple sclerosis"[All Fields] OR ("multiple"[All Fields] AND "sclerosis"[All Fields])) AND ("atrophy"[MeSH Terms] OR "atrophy"[All Fields]) AND ("glatiramer" [All Fields] OR "acetate" [All Fields] OR "glatiramer acetate"[All Fields] OR "interferon"[All Fields] OR "teriflunomide"[All Fields] OR "dimethyl"[All Fields] OR "fumarate"[All Fields] OR "dimethyl fumarate"[All Fields] OR "BG12"[All Fields] OR "BG-12"[All Fields] OR "laquinimod"[All Fields] OR "natalizumab"[All Fields] OR "fingolimod"[All Fields] OR "alemtuzumab"[All Fields] OR "daclizumab"[All Fields] OR "ocrelizumab"[All Fields]) AND ("1990/01/01"[CRDAT] : "2014/06/01"[CRDAT]).
