# Supplementary material
Source: publisher figshare collection journal article supplement (https://plos.figshare.com/articles/dataset/_/3959250)

## S2 Fig

**Risk of bias graph: review authors' judgements about each risk of bias item presented as percentages across all included studies.**

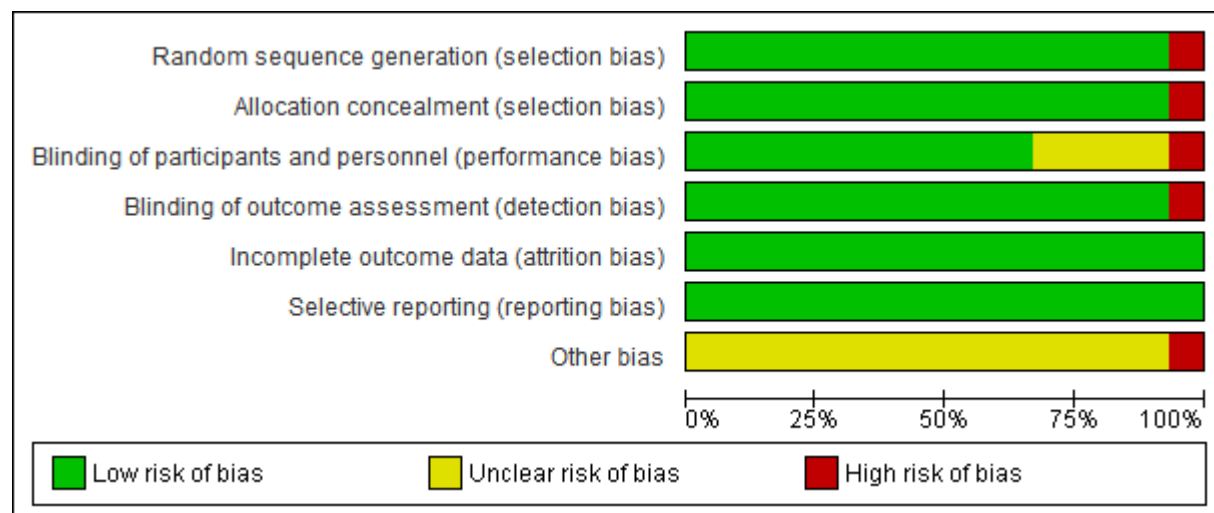

Supplement: Supplementary file 1 [file 1 › S2 Fig.PDF]
