# Supplementary material
Source: publisher figshare collection journal article supplement (https://plos.figshare.com/articles/dataset/_/3959250)
Supplement: Supplementary file 1 [file 1 › S3 Fig.PDF]

## S3 Fig

Forest plot of comparison between SLDMD and placebo at 12 months (A), FLDMD and placebo at 12 months (B), SLDMD and placebo at 24 months (C), FLDMD and placebo at 24 months (D).

(A)

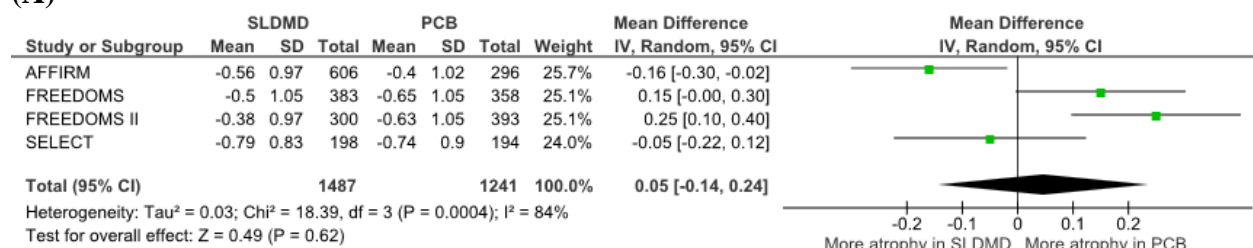

(B)

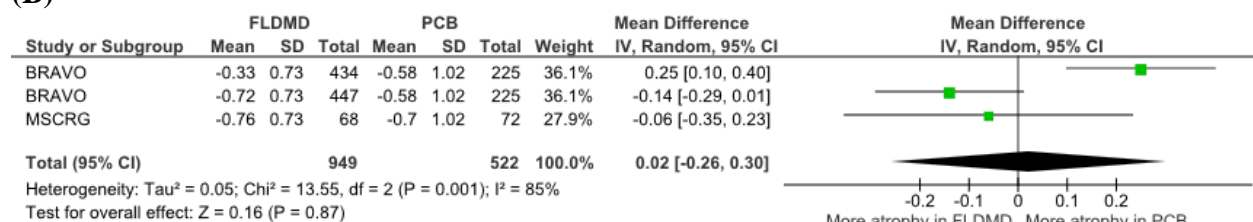

(C)

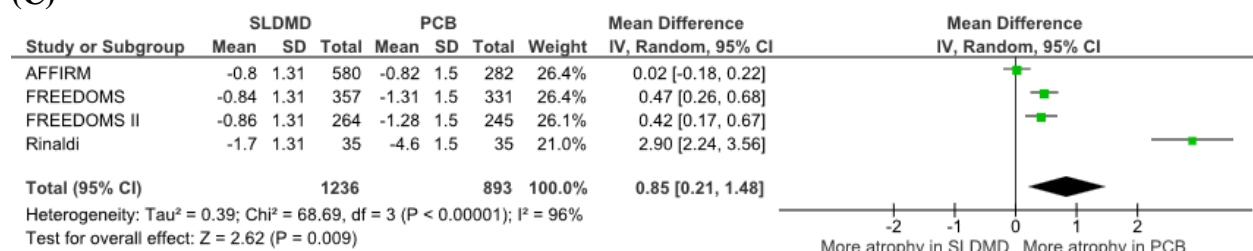

(D)

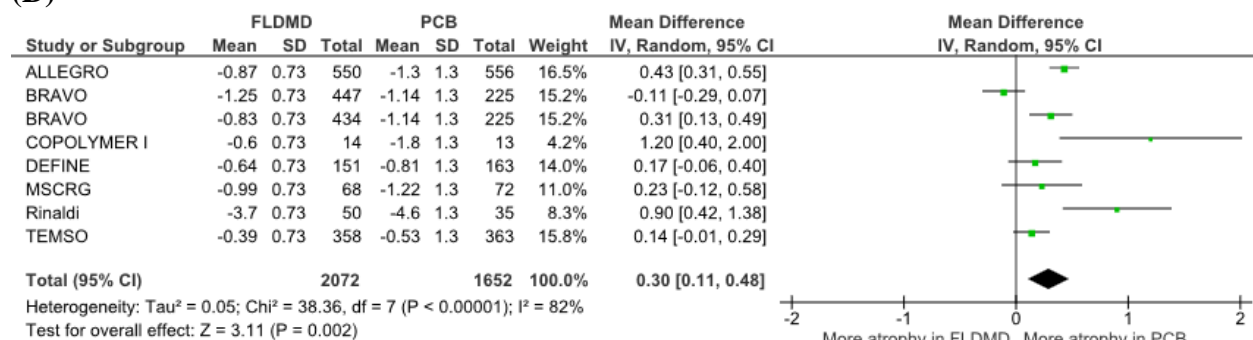

DMD: Disease Modifying Drug; FLDMD: First-line DMD; SLDMD: Second-line DMD; PCB: Placebo;  
 SD: Standard Deviation.
